# Supplementary material for: Patient perspective of tardive dyskinesia: results from a social media listening study
Source: Springer Nature journal article supplement (doi:10.1186/s12888-021-03074-9), 2021-02-15

# Number of Posts

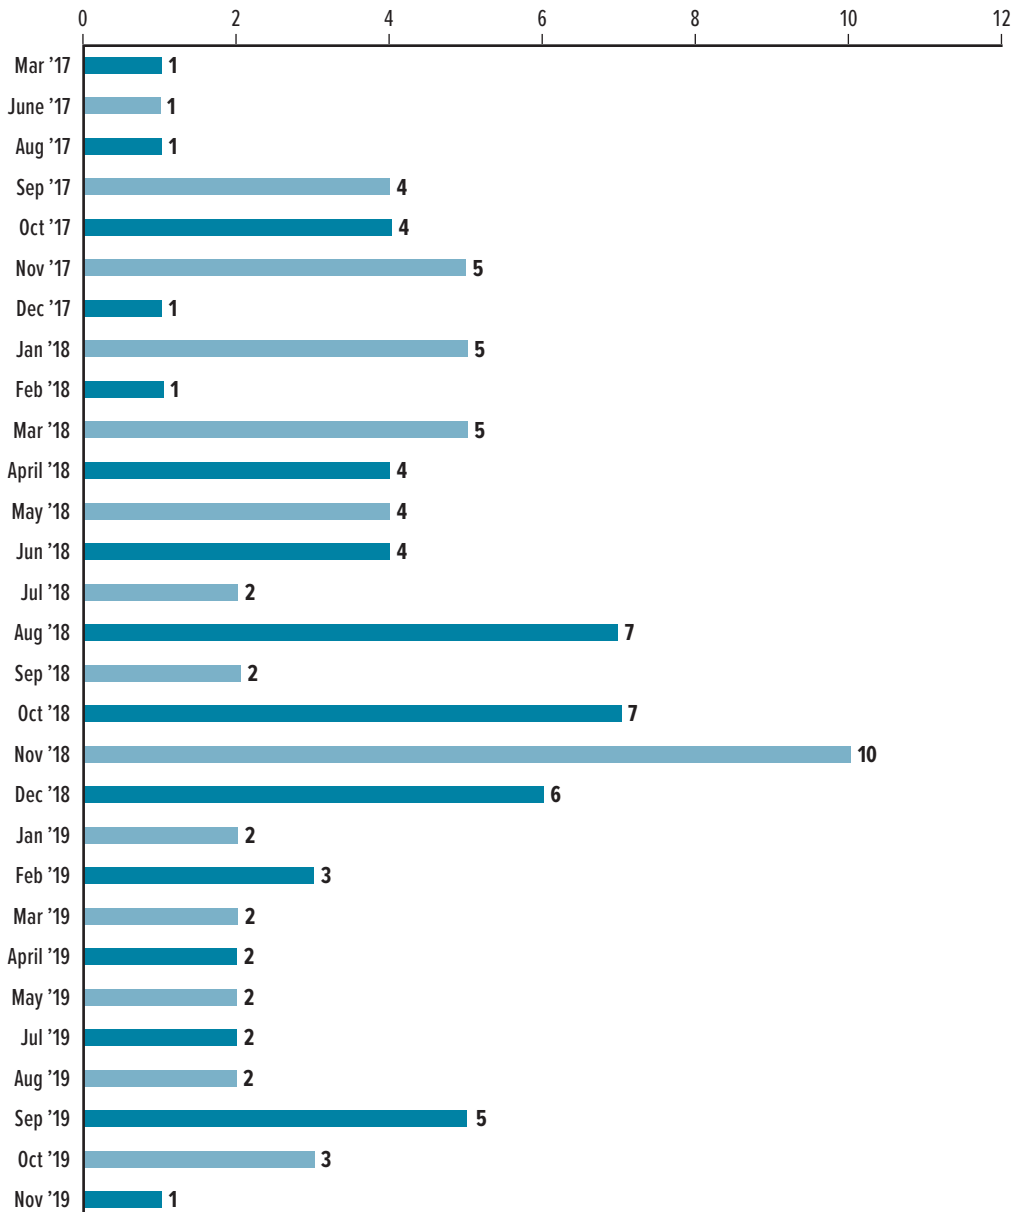

Supplement: MOESM1 [file 18863128]
